# Supplementary material for: Enhancing catalytic performance of Pt-based electrodes with a noncovalent interaction-induced functionalized carbon nanotube-grafted matrix
Source: Royal Society of Chemistry journal article supplement (doi:10.1039/c2jm32600k), 2012-01-01
Supplement: c2jm32600k.pdf [file c2jm32600k.pdf]

## Supplementary Information

for

### **Enhancing catalytic performance of Pt-based electrodes with noncovalent interaction-induced functionalized carbon nanotubes-grafted matrix**

By

**Le Quynh Hoa,<sup>\*a</sup> Mun'delanji C. Vestergaard,<sup>b</sup> Hiroyuki Yoshikawa,<sup>a</sup> Masato Saito<sup>a</sup> and Eiichi Tamiya<sup>\*a</sup>**

<sup>a</sup> Department of Applied Physics, Graduate School of Engineering, Osaka University,  
2-1 Yamadaoka, Suita, Osaka 565-0871, Japan

<sup>b</sup> School of Materials Science & Centre of Graduate Education Initiative, Japan  
Advanced Institute of Science and Technology, 1-1 Asahidai, Nomi City, Ishikawa  
923-1292, Japan

#### Table of Contents

|                                                                                                 |   |
|-------------------------------------------------------------------------------------------------|---|
| 1. SEM images of COOH-MWCNTs grafted Pt/MWCNTs on carbon sheet .....                            | 2 |
| 2. Quantification of electrochemical active surface area of Pt on different matrix .....        | 2 |
| 3. Zeta potential and size distribution profiles .....                                          | 3 |
| 4. ATR-FTIR of functionalized multi-walled carbon nanotubes .....                               | 4 |
| 5. Electrochemical impedance spectroscopy (EIS) studies .....                                   | 5 |
| 6. Effect of scan rate on ethanol oxidation current density derived from grafted catalyst ..... | 5 |

## 1. SEM images of COOH-MWCNTs grafted Pt/MWCNTs on carbon sheet

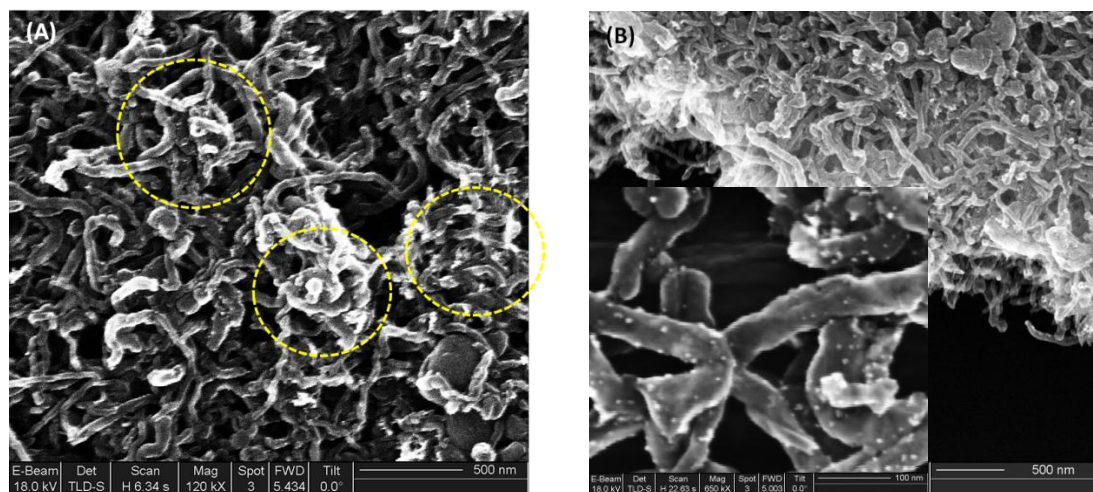

**Fig. S1** SEM image of COOH-MWCNTs grafted Pt/MWCNTs on carbon sheet. Figure S1A shows 3 clusters of COOH-MWCNTs grafted Pt/MWCNTs and Figure 1SB shows the thickness of the whole catalyst layer on carbon sheet. The inset of Figure 1SB shows the Pt nanoparticles decorated on MWCNTs on carbon paper.

## 2. Quantification of electrochemical active surface area of Pt on different matrix

The electrochemical properties of Pt nanoparticles decorated on MWNTs then deposited on f-MWNTs modified glassy carbon electrodes have been investigated by CV as shown in Fig. 3A. The voltammetric features of all Pt/MWNTs with and without f-MWNTs supporting matrix reveal the typical characteristic of Pt metal with the adsorption and desorption ( $Q_{H-ads}$  and  $Q_{H-des}$ ) of hydrogen between -0.2 and 0.1 V and the oxide formation and reduction in the 0.6 V to 1 V range and 0.3 to 0.5 V (vs. Ag/AgCl), respectively. Using the charge passed for hydrogen adsorption and desorption, the Pt areas were calculated electrochemically according to the following formula:

$$A = \frac{\sum Q_H}{Q_{ref}(Pt \text{ loading})}$$

A: Active surface area ( $\text{cm}^2 \text{ cm}^{-2}$ )

$$\sum Q_H = Q_{H-ads} + Q_{H-des}$$

$$Q_{ref} = 0.21 \text{ mC cm}^{-2}$$

Pt loading for all electrodes:  $0.05 \text{ mg cm}^{-2}$

As calculated from the data in Figure 2 (manuscript), the  $Q_{H-des}$  is  $1.03\text{E-}04$  and  $Q_{H-ads}$  is  $8.47\text{E-}05$ . Thus, the final active surface area is  $253.0786 \text{ (cm}^2 \text{ cm}^{-2}\text{)}$ . The calculation for

COOH-MWCNTs-g-Pt/MWCNTs and NH<sub>2</sub>-R-MWCNTs-g-Pt/MWCNTs could not be done due to the change of redox pattern that diminish hydrogen adsorption and desorption regions.

### 3. Zeta potential and size distribution profiles

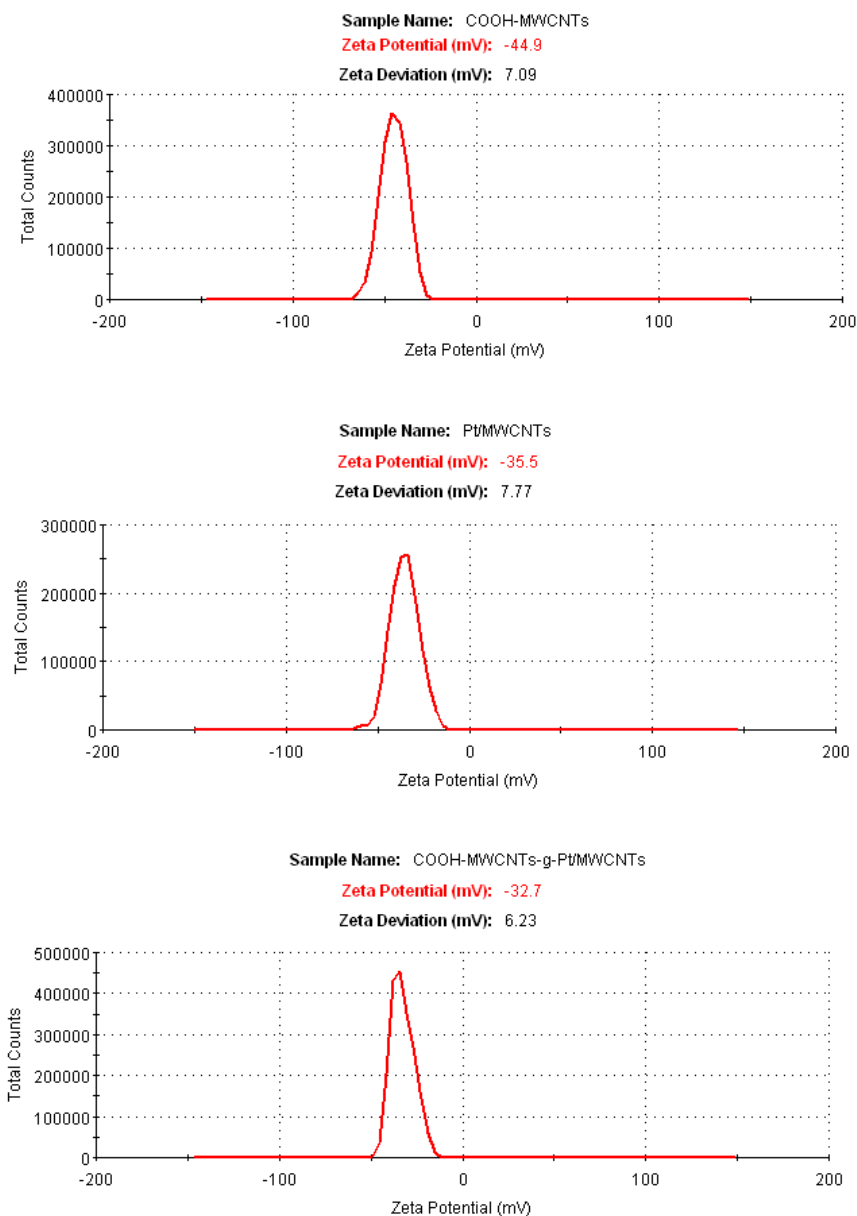

**Fig. S2** Zeta potential distribution of COOH-MWCNTs, Pt/MWCNTs and COOH-MWCNTs-g-Pt/MWCNTs in water. The concentration of the catalyst was 0.1 mg/mL, and pH was ~7.

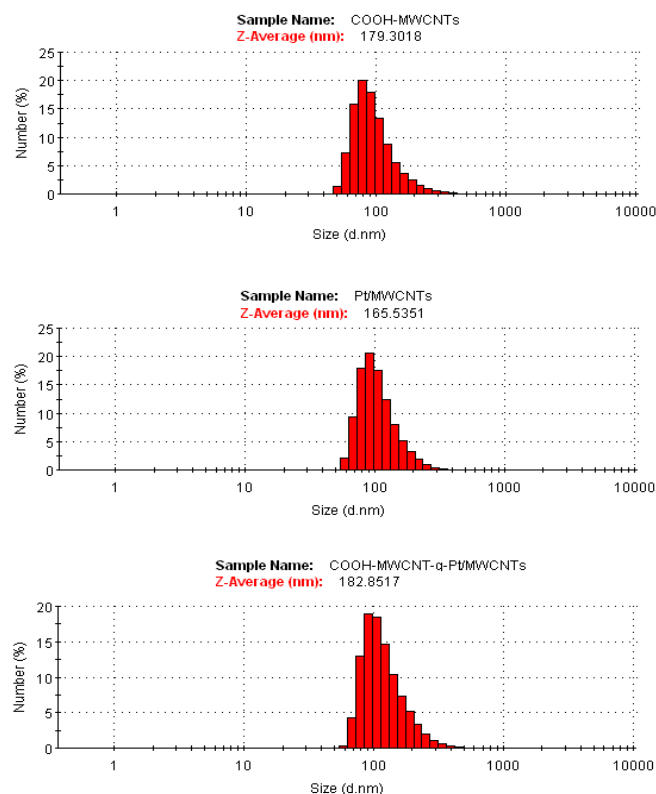

**Fig. S3** Size distribution of COOH-MWCNTs, Pt/MWCNTs and COOH-MWCNTs-g-Pt/MWCNTs in water. Concentration of the catalyst was 0.1 mg/mL, and pH was ~7

#### 4. ATR-FTIR of functionalized multi-walled carbon nanotubes

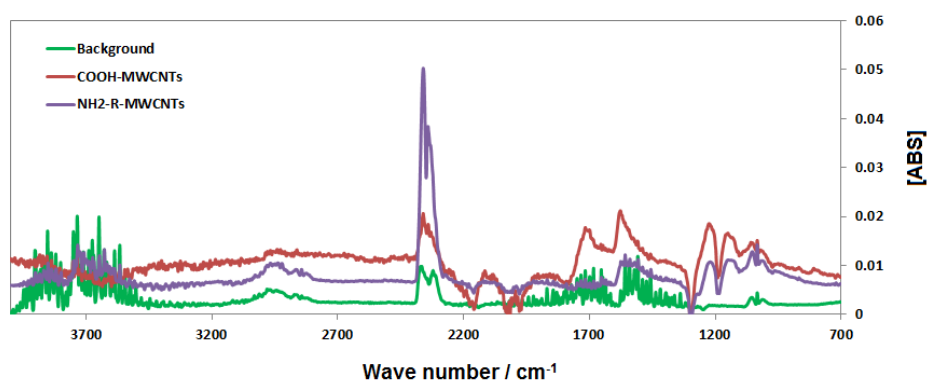

**Fig. S4** FTIR-ATR spectra of COOH-MWCNTs compared with NH<sub>2</sub>-C<sub>2</sub>H<sub>4</sub>-MWCNTs as a thin layer on diamond detecting surface. The background sample is measured under cleaned diamond surface which features the peaks of water and CO<sub>2</sub>.

## 5. Electrochemical impedance spectroscopy (EIS) studies

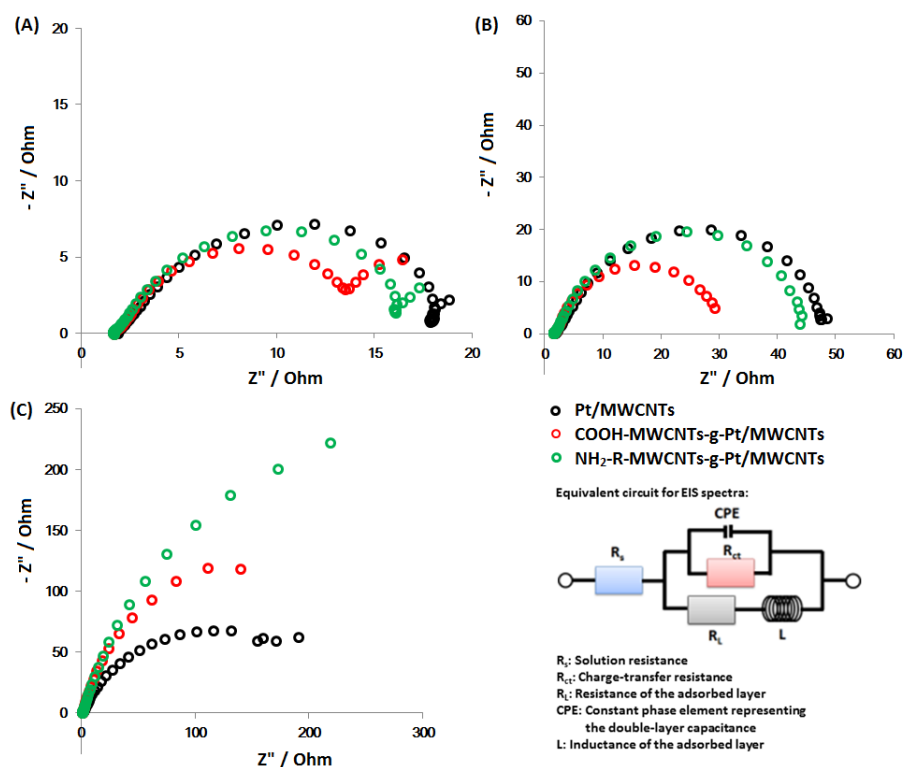

**Fig. S5** EIS of f-MWCNTs supported Pt/MWCNTs in C<sub>2</sub>H<sub>5</sub>OH 1 M and H<sub>2</sub>SO<sub>4</sub> 0.5 M at 0 mV (4A); 300 mV (4B) and 600 mV (4C) and the equivalent circuit.

## 6. Effect of scan rate on ethanol oxidation current density derived from grafted catalyst

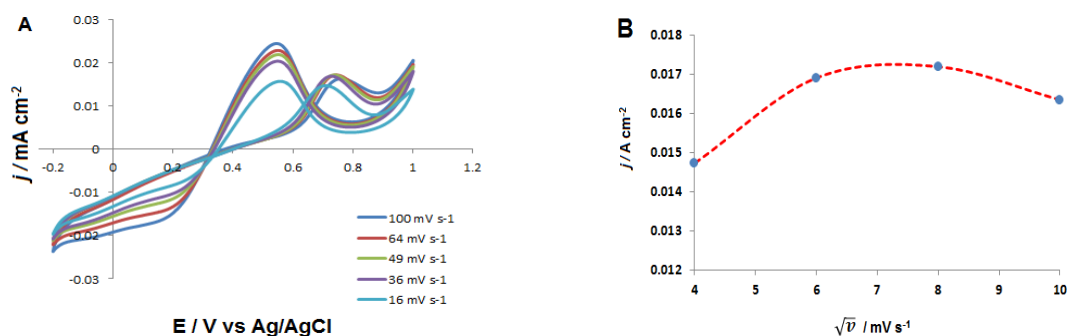

**Fig. S6** Effect of scan rate dependence of COOH-MWCNTs-g-Pt/MWCNTs on ethanol oxidation current density. (A) The CVs of COOH-MWCNTs-g-Pt/MWCNTs on carbon

substrates at different scan rates and (B) the dependence of oxidation current density on scan rate. The electrolyte is C<sub>2</sub>H<sub>5</sub>OH 1 M, H<sub>2</sub>SO<sub>4</sub> 0.5 M.

$$i_p = (\text{Constant}) n(\alpha n_a)^{1/2} A C D^{1/2} \nu^{1/2}$$

Where  $n$  is the number of electron;  $n_a$  is the number of electron involved in the charge-transfer step;  $A$  is the electrode area (cm<sup>2</sup>);  $C$  is the concentration (in mol cm<sup>-3</sup>);  $D$  is the diffusion coefficient (in cm<sup>2</sup> s<sup>-1</sup>),  $\nu$  is the scan rate (V s<sup>-1</sup>);  $i_p$  is the peak current and  $\alpha$  is the transfer coefficient.

By studying the effect of scan rate on the ethanol oxidation current density, we further investigated the reason behind the significant variation of peak current at a lower scan rate (Fig. 8A). For linear diffusion, the peak current ( $i_p$ ) varies with  $\nu^{1/2}$ , however in the case of grafted structure when the scan rate ( $\nu$ ) is increased, the oxidation current density shows a non-linear relationship suggesting that there is mass-transfer limitation for this structural catalyst. We propose that the grafted structure forms cluster(s) around Pt active sites, and that these create a retard of reactant inside these clusters. Although the clustered structure allows the reactant species to gain a lower activation energy and promotes further oxidized, it creates somewhat difficulty for a fresh ethanol molecular to penetrate and start a new reaction on the inner Pt active site.
